# Supplementary material for: Dietary essential amino acids restore liver metabolism in ovariectomized mice via hepatic estrogen receptor α
Source: PubMed Central journal article supplement (PMC8617046; doi:10.1038/s41467-021-27272-x), 2021-11-25
Supplement: 41467_2021_27272_MOESM1_ESM.pdf [file 41467_2021_27272_MOESM1_ESM.pdf]

## **SUPPLEMENTAL INFORMATION**

Supplementary Fig. 1

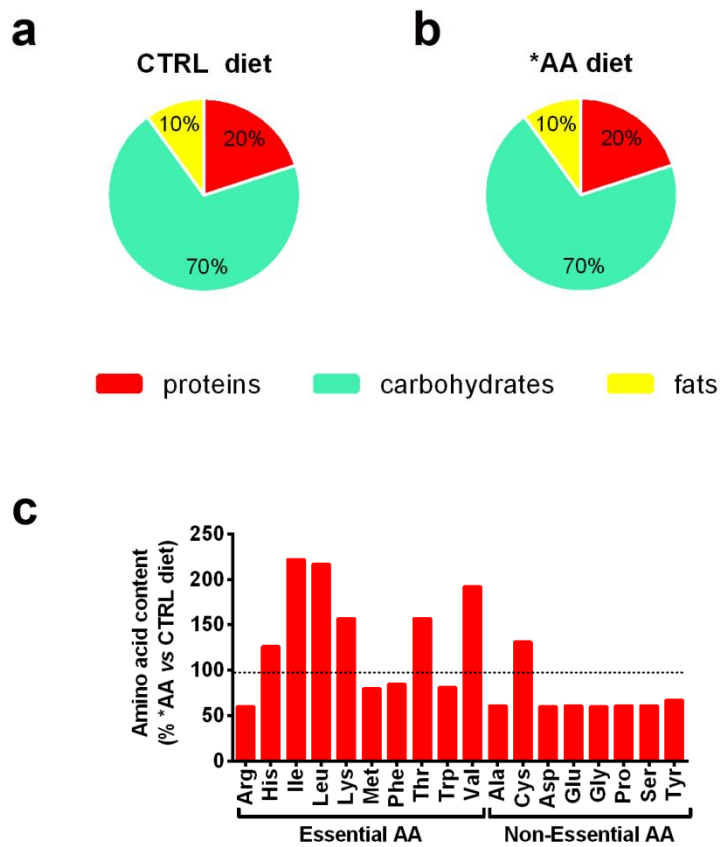

**Supplementary Fig. 1. Composition of CTRL and \*AA diets.** (a, b) Pie charts showing the composition of CTRL (a) and \*AA (b) diets as Kcal %. c Amino acid content of the \*AA diet expressed as percentage *versus* CTRL diet. Source data are provided as a Source Data file.

Supplementary Fig. 2

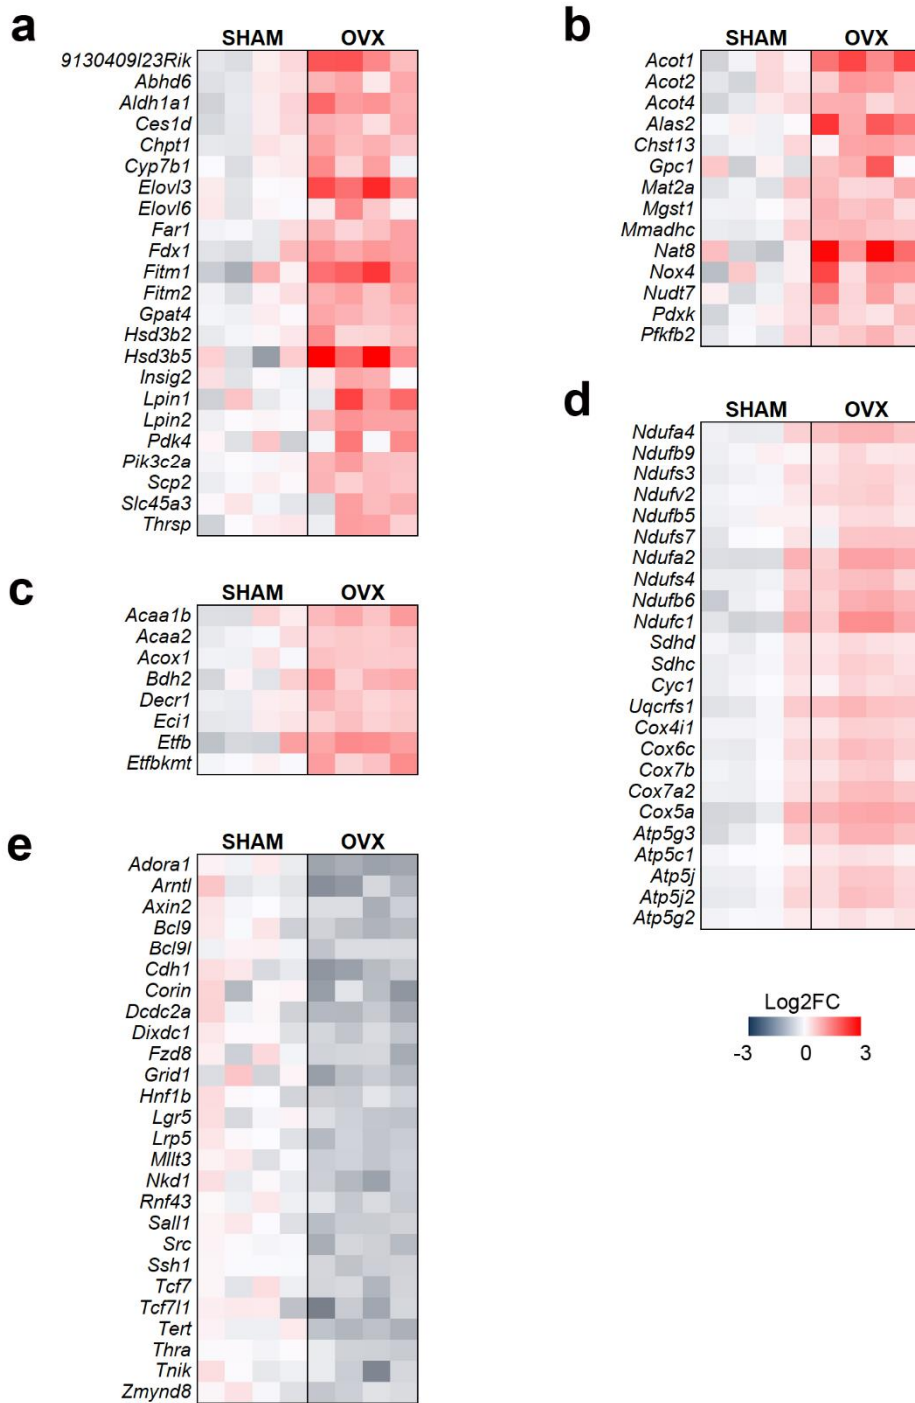

**Supplementary Fig. 2. Enrichment analysis of DEGs measured in the liver of OVX  $ER\alpha^{f/f}$  females.** **a-e** Heatmaps reporting as Log<sub>2</sub>FC the expression of genes altered by OVX in the liver of  $ER\alpha^{f/f}$  females and associated with lipid biosynthetic process (**a**), acyl-CoA metabolic process (**b**), fatty acid -oxidation (**c**), mitochondrial ATP synthesis coupled electron transport (**d**), and Wnt signaling pathway (**e**) from RNA-Seq analysis (n=4). Source and processed data are provided in <sup>1</sup> and as a Source Data file.

**Supplementary Fig. 3**

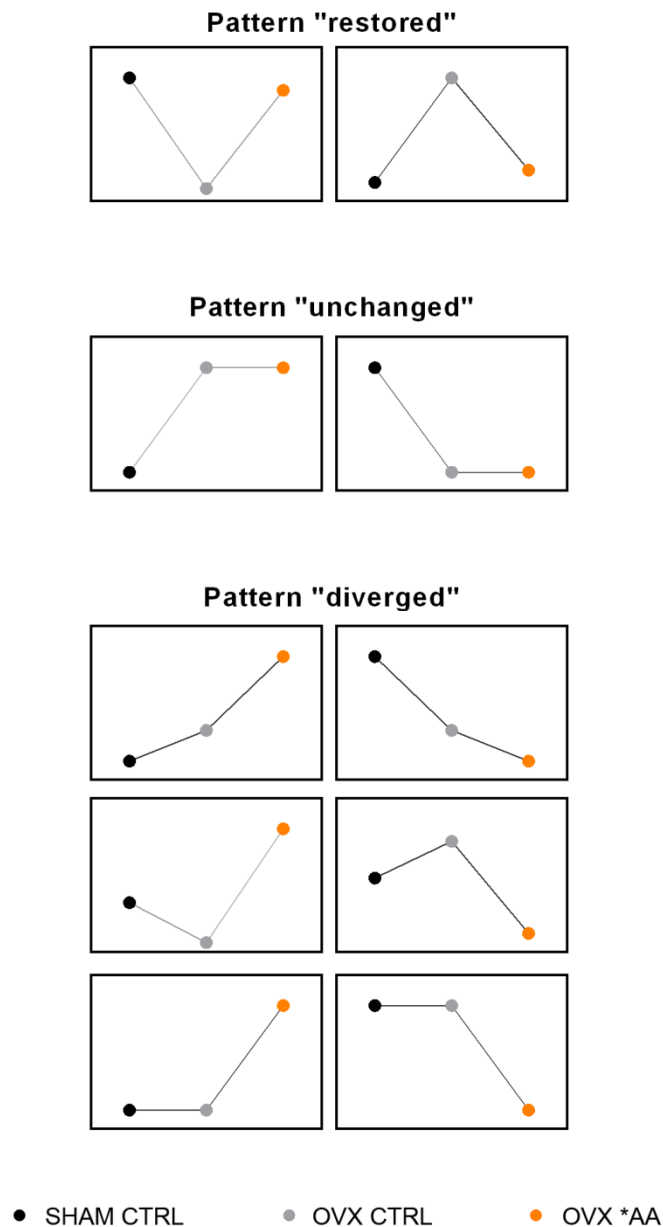

**Supplementary Fig. 3. Theoretical expression patterns of genes altered by OVX and/or by \*AA diet in the liver of  $ER\alpha^{f/f}$  females.** Theoretical expression profile of DEGs obtained by RNA-Seq analysis performed in the liver of SHAM  $ER\alpha^{f/f}$  females fed with CTRL diet and OVX  $ER\alpha^{f/f}$  females fed with CTRL or \*AA diet. Gene expression is shown in vertical axis; lines and dots represent samples and their average expression. DEGs can be grouped in 3 classes according to the absolute variation in their expression profile: to the "restored" class belong genes, whose expression is impaired by OVX and re-established by \*AA diet to the levels measured in the liver of SHAM females; to the "unchanged" class belong genes, whose expression is affected by OVX and unmodified by \*AA diet; to the "diverged" class belong genes, whose expression is unaffected or changed by OVX and further altered by \*AA diet.

## Supplementary Fig. 4

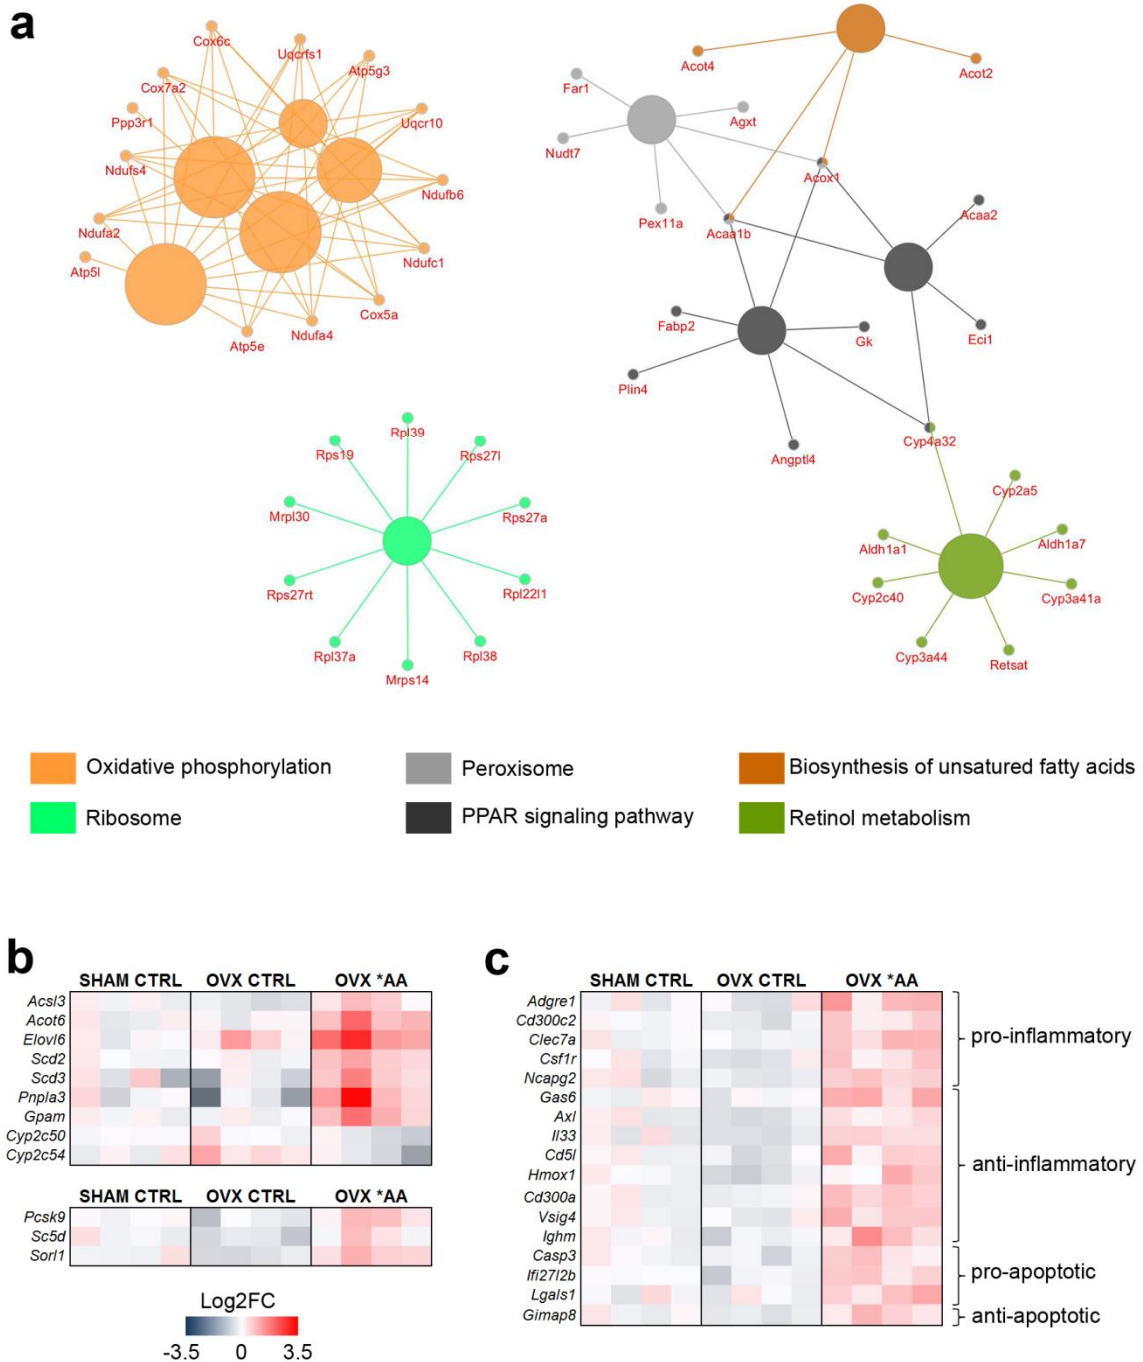

**Supplementary Fig. 4. Enrichment analysis of DEGs whose expression resulted unchanged or diverged by \*AA diet in the liver of OVX ER $\alpha^{ff}$  females. (a) Cluster analysis of KEGG networks from RNA-Seq (n=4) significantly enriched among the genes unchanged by \*AA diet in the liver of OVX ER $\alpha^{ff}$  females. (b, c) Heatmaps reporting as Log<sub>2</sub>FC the expression of the most enriched genes among the diverged class: fatty acid and cholesterol metabolic process (b) and regulation of immune response (c). Source and processed data are provided in <sup>1</sup> and as a Source Data file.**

## Supplementary Fig. 5

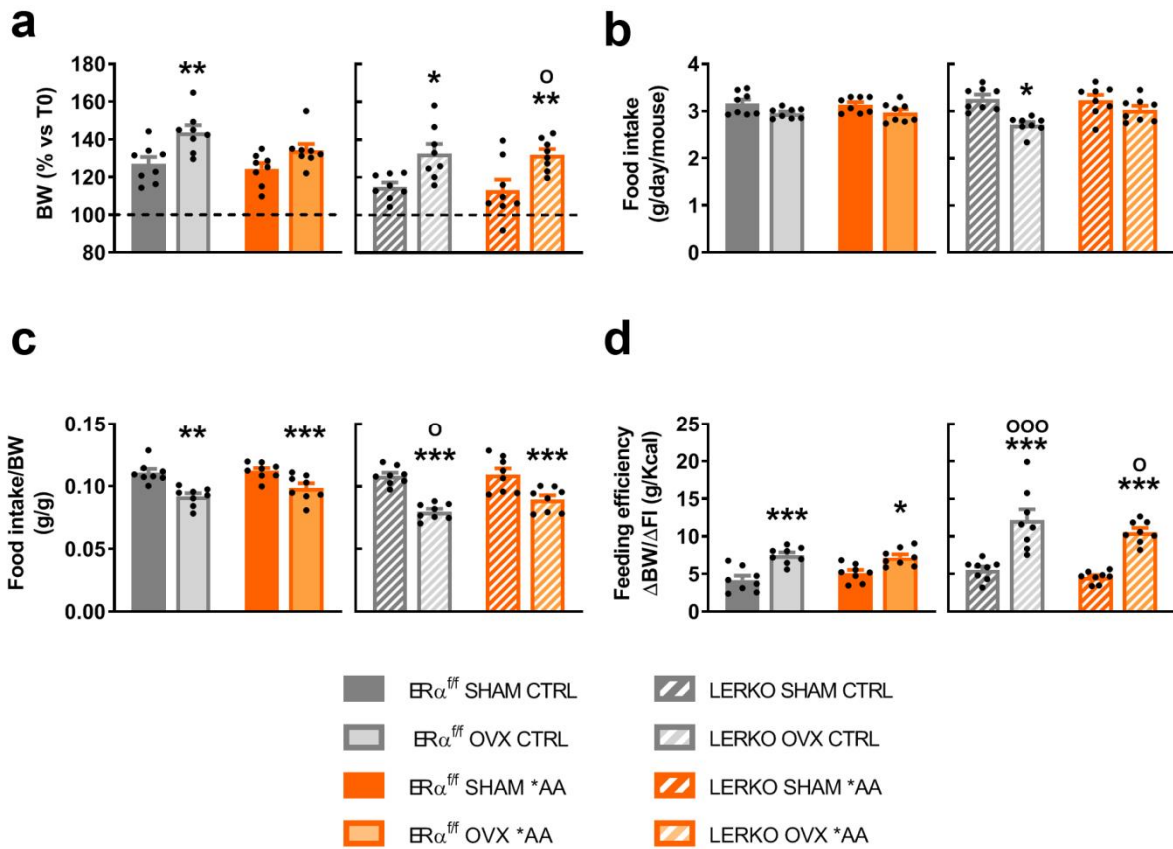

**Supplementary Fig. 5. Systemic response to \*AA diet. a** Body weight (BW) (expressed as % versus time 0) of SHAM and OVX ER $\alpha^{f/f}$  and LERKO females fed with CTRL or \*AA diet measured at the end of the 12 weeks long experiment. Data are shown as mean  $\pm$  SEM (n = 8). \* $p < 0.05$  and \*\* $p < 0.01$  OVX vs SHAM;  $^{\circ}p < 0.05$  LERKO OVX \*AA vs ER $\alpha^{f/f}$  OVX \*AA by two-way ANOVA followed by Bonferroni's *post hoc* test. **b** Food intake expressed as g/day/mouse measured along the 3 month-long experiment. Data are shown as mean  $\pm$  SEM (n = 8). \* $p < 0.05$  LERKO OVX CTRL vs LERKO SHAM CTRL by two-way ANOVA followed by Bonferroni's *post hoc* test. **c** Food intake normalized over body weight (BW) expressed as g/g. Data are shown as mean  $\pm$  SEM (n = 8). \*\*\* $p < 0.001$  and \*\* $p < 0.005$  OVX vs SHAM;  $^{\circ}p < 0.05$  LERKO OVX CTRL vs ER $\alpha^{f/f}$  OVX CTRL by two-way ANOVA followed by Bonferroni's *post hoc* test. **d** Feeding efficiency expressed as  $\Delta$ BW/ $\Delta$ FI ( $\Delta$ Body weight/ $\Delta$ Food intake). Data are represented as mean  $\pm$  SEM (n = 8). \* $p < 0.05$  and \*\*\* $p < 0.001$  OVX vs SHAM;  $^{\circ}p < 0.05$  LERKO OVX \*AA vs ER $\alpha^{f/f}$  OVX \*AA and  $^{\circ\circ}p < 0.001$  LERKO OVX CTRL vs ER $\alpha^{f/f}$  OVX CTRL by two-way ANOVA followed by Bonferroni's *post hoc* test. Source data are provided as a Source Data file.

Supplementary Fig. 6

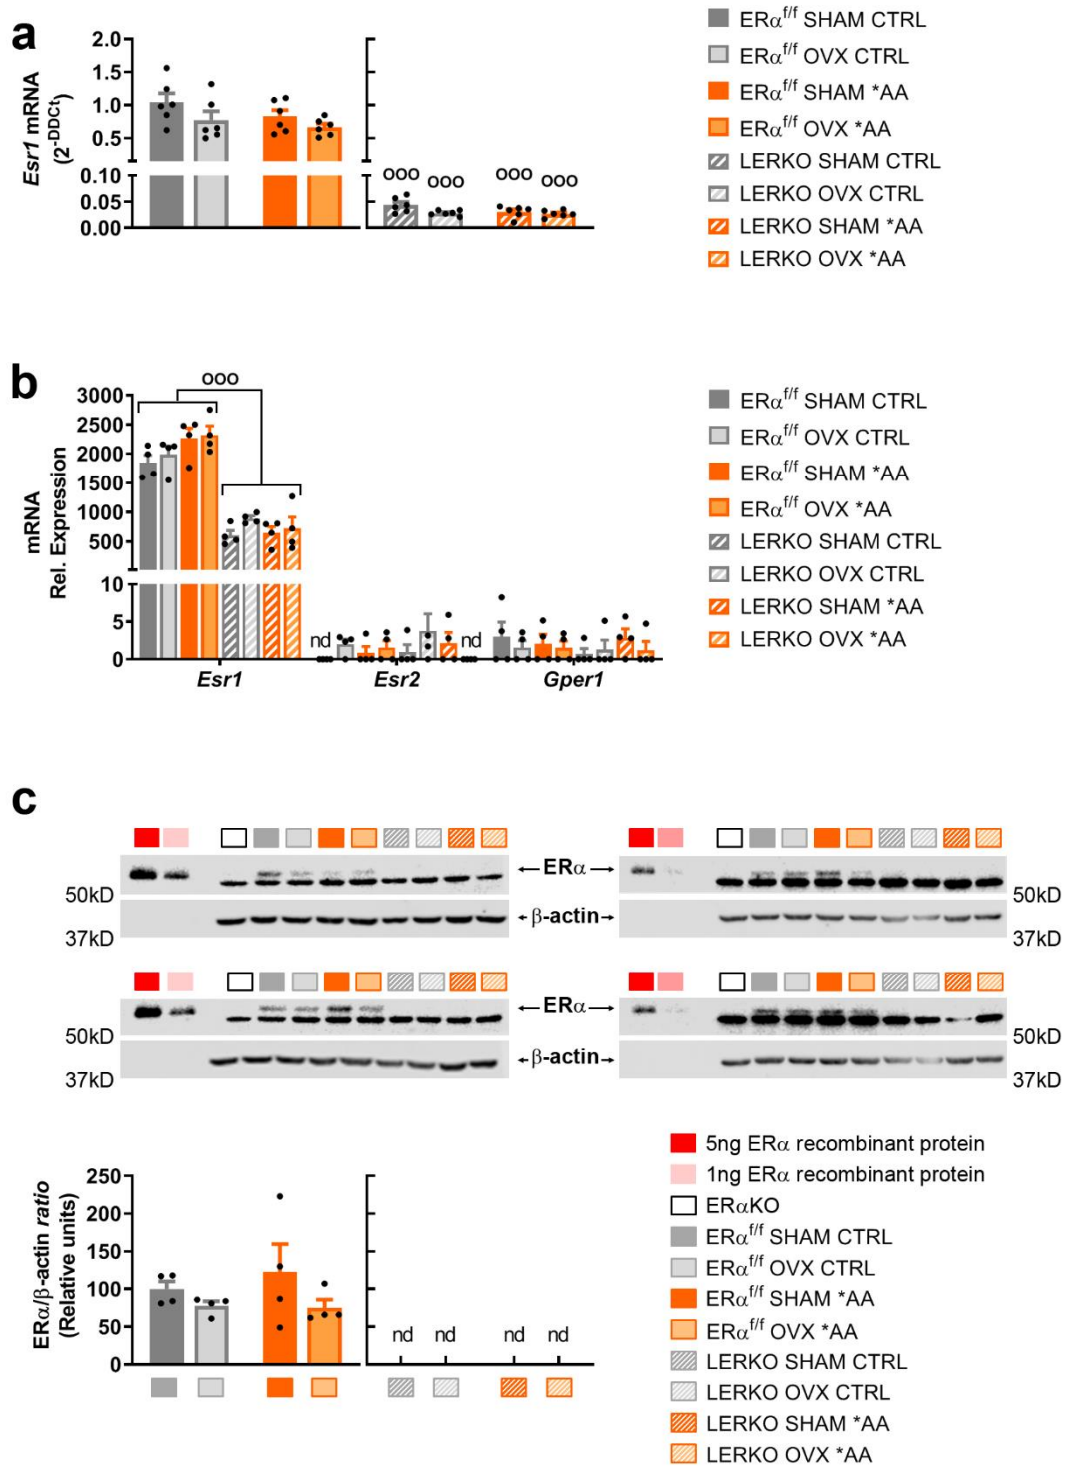

**Supplementary Fig. 6. Dietary treatment did not affect the hepatic expression of ERs.** a mRNA content of *Esr1* (coding for ER ) measured by RTPCR in the liver of SHAM and OVX ER $\alpha^{ff}$  and LERKO females fed with CTRL or \*AA diet. Data are represented as mean  $\pm$  SEM (n=6).  $^{\circ\circ\circ}p < 0.001$  LERKO vs ER $\alpha^{ff}$  by two-way ANOVA followed by Bonferroni's *post hoc* test.

**b** Relative expression of mRNA content of *Esr1* (codifying for ER $\alpha$ ), *Esr2* (codifying for ER $\beta$ ), and *Gper1* (codifying for GPR30) measured by RNA-Seq in the liver of SHAM and OVX ER $\alpha^{ff}$  and LERKO females fed with CTRL or \*AA diet. Data are mean  $\pm$  SEM (n=4).  $^{\circ\circ\circ}p < 0.001$  LERKO vs ER $\alpha^{ff}$  by two-way ANOVA followed by Bonferroni's *post hoc* test. **c** Representative western blot and semiquantitative analysis of ER $\alpha$  protein in liver extracts from SHAM and OVX ER $\alpha^{ff}$  and LERKO females fed with CTRL or \*AA diet. ER $\alpha$  recombinant protein and liver extract from ER $\alpha$  KO mouse were used as positive and negative control, respectively. Data are represented as mean  $\pm$  SEM (n=4). Uncropped and unprocessed scans of the blots and source data are provided as a Source Data file.



Supplementary Fig. 7

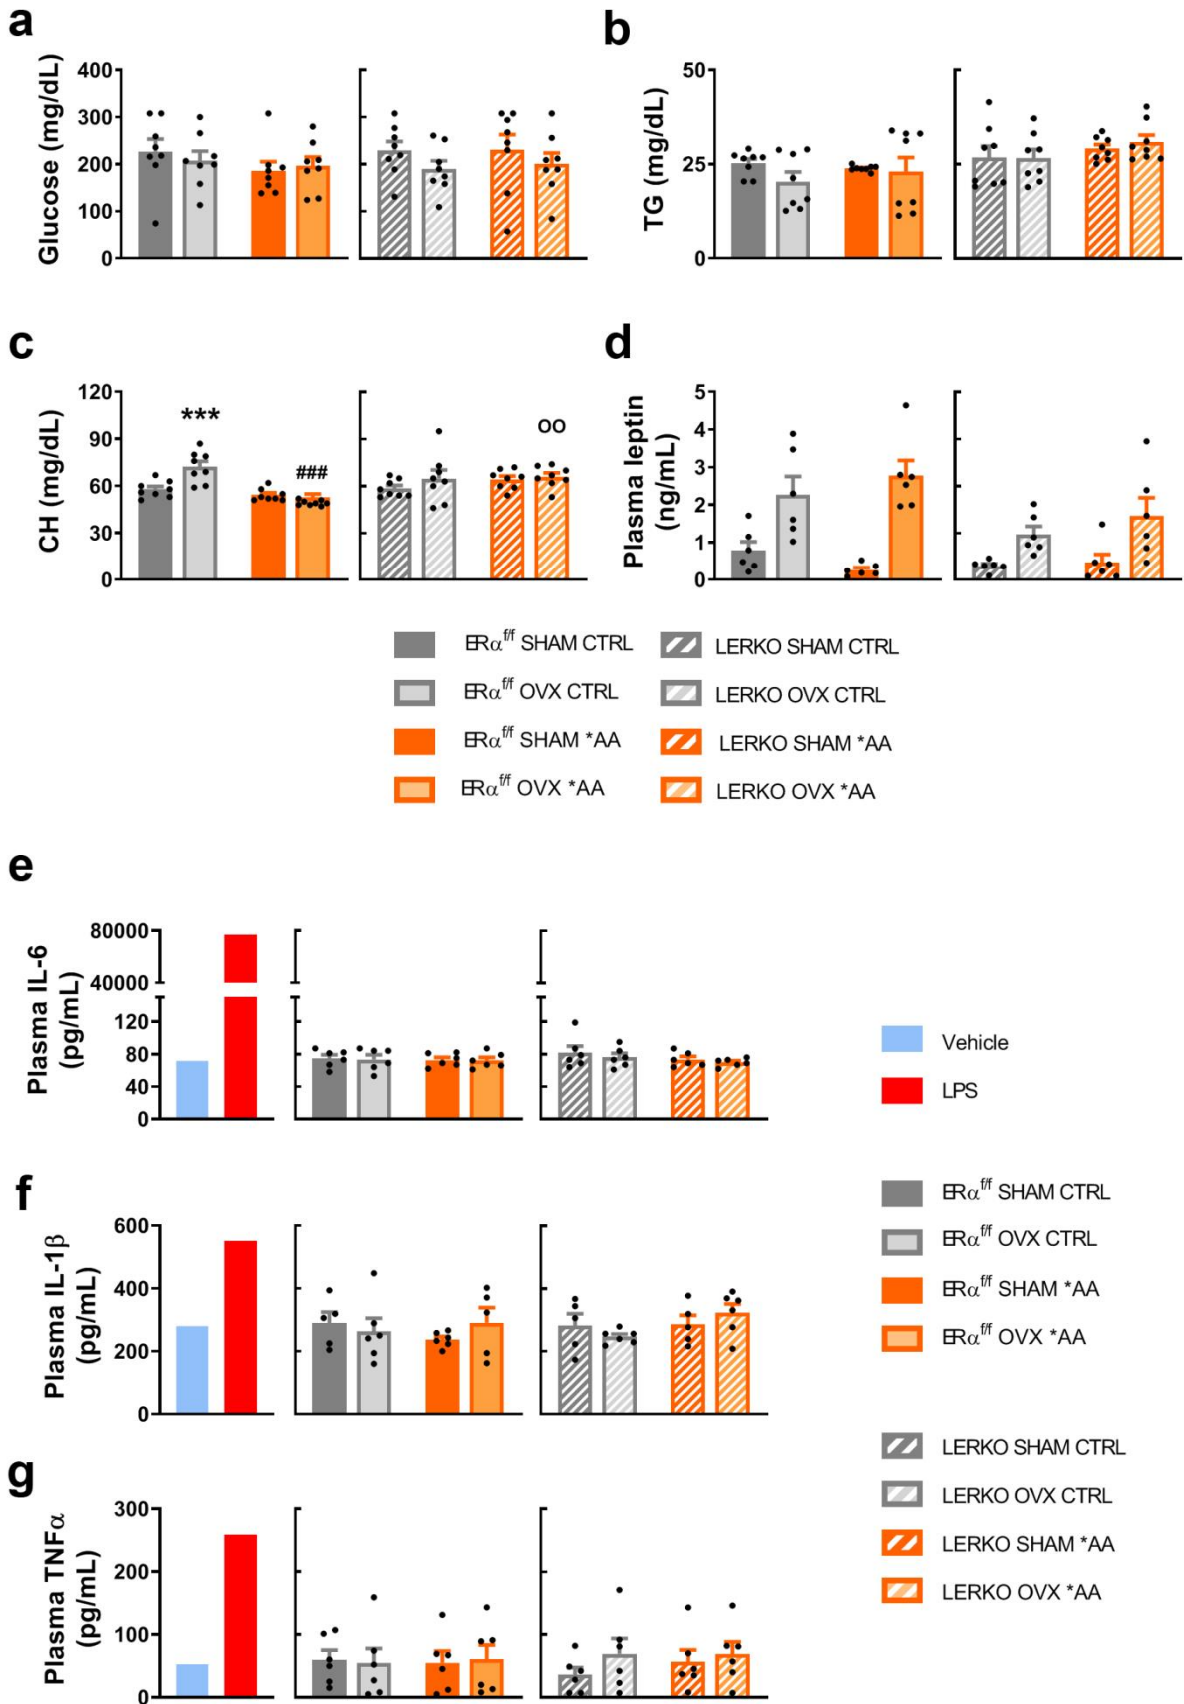

**Supplementary Fig. 7. Circulating levels of metabolic and inflammatory markers. a-d** Circulating levels of glucose (a), triglycerides (TG) (b), cholesterol (CH) (c), and leptin (d) measured in the plasma of SHAM and OVX ER $\alpha^{ff}$  and LERKO females fed with CTRL or \*AA diet. Data are shown as mean  $\pm$  SEM (n = 8). \*\*\* $p < 0.001$  OVX vs SHAM; ### $p < 0.001$  \*AA vs CTRL diet; °° $p < 0.005$  LERKO vs ER $\alpha^{ff}$  by two-way ANOVA followed by Bonferroni's *post hoc* test. **e-g** Circulating levels of interleukin 6 (IL-6) (e), interleukin 1 (IL-1) (f) and tumor necrosis factor (TNF- $\alpha$ ) (g) measured in the plasma of SHAM and OVX ER $\alpha^{ff}$  and LERKO females fed with CTRL or \*AA diet. Data are shown as mean  $\pm$  SEM (n = 6). The levels of circulating cytokines in mice treated with vehicle or 15mg/Kg Lipopolysaccharide (LPS) are shown as internal control of the assays. Source data are provided as a Source Data file.

## Supplementary Fig. 8

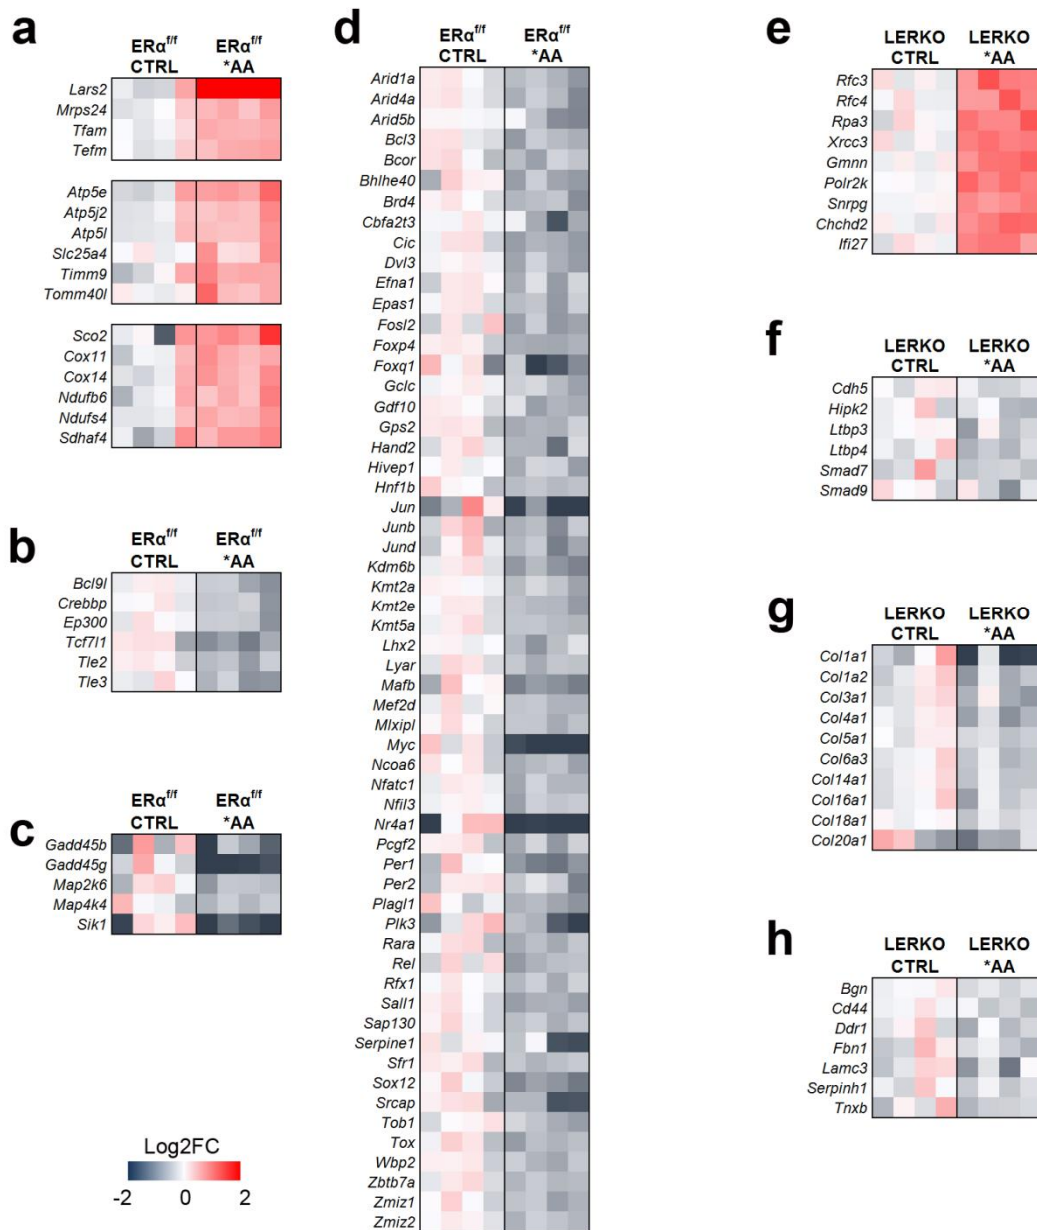

**Supplementary Fig. 8. \*AA-induced changes in the liver of SHAM females.** **a-d** Heatmaps reporting as Log<sub>2</sub>FC the expression of genes modulated by \*AA diet exclusively in the liver of ER<sup>ff</sup> females and associated with ATP synthesis/metabolism and mitochondrial respiratory chain (**a**), -catenin TCF assembly pathway (**b**), cell cycle (**c**), regulation of transcription (**d**) from RNA-Seq analysis (n=4). **e-h** Heatmaps reporting as Log<sub>2</sub>FC the expression of genes modulated by \*AA diet exclusively in the liver of LERKO females and associated with DNA repair (**e**), TGF- $\beta$  1 signaling pathway (**f**), collagen metabolism (**g**), extracellular matrix organization (**h**) from RNA-Seq analysis (n=4). Source and processed data are provided in <sup>1</sup> and as a Source Data file.

## Supplementary Fig. 9

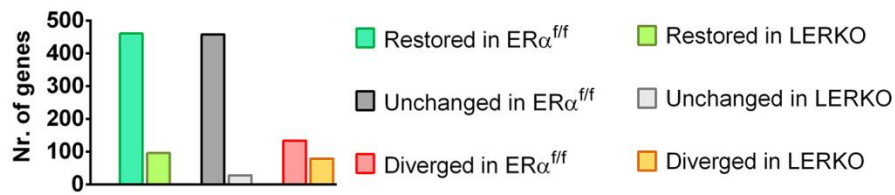

**Supplementary Fig. 9. \*AA diet-induced changes in the liver of OVX females: comparison between ER<sup>ff</sup> and LERKO females.** Cluster analysis was performed with Genesis software to identify the number of genes belonging to ðrestoredð, ðunchangedð, and ðdivergedð class in ER $\alpha^{ff}$  and LERKO females (see also Supplementary Fig. 3). Source and processed data are provided in <sup>1</sup> and as a Source Data file.

## Supplementary Fig. 10

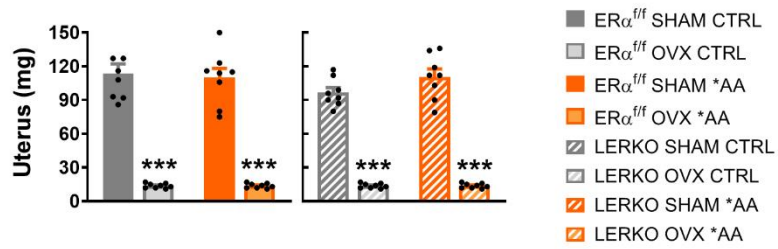

**Supplementary Fig. 10. OVX but not \*AA diet significantly affects the uterus weight.** Uterine weight changes in SHAM and OVX ER $\alpha^{f/f}$  and LERKO females fed with CTRL or \*AA diet. Data are shown as mean  $\pm$  SEM (n = 8). \*\*\* $p < 0.001$  OVX vs SHAM by two-way ANOVA followed by Bonferroni's *post hoc* test. Source data are provided as a Source Data file.

**Supplemental Table 1: Formula of the diets used in the study.**

|                                       | CTRL (g) | *AA (g) |
|---------------------------------------|----------|---------|
| L-Cystine                             | 3        | 3       |
| L-Arginine                            | 6        | 3.6     |
| L-Histidine                           | 4.6      | 5.8     |
| L-Isoleucine                          | 7.6      | 16.87   |
| L-Leucine                             | 15.8     | 34.22   |
| L-Lysine                              | 13.2     | 20.74   |
| L-Methyionine                         | 5.1      | 4.1     |
| L-Phenylalanine                       | 8.4      | 7.1     |
| L-Threonine                           | 7.2      | 11.3    |
| L-Tryptophan                          | 2.1      | 1.7     |
| L-Valine                              | 9.3      | 17.87   |
| L-Alanine                             | 5.1      | 3.1     |
| L-Cysteine                            | 4.2      | 5.5     |
| L-Aspartic acid                       | 12.1     | 7.3     |
| L-Glutamic acid                       | 38.2     | 23.2    |
| L-Glycine                             | 3        | 1.8     |
| L-Proline                             | 17.8     | 10.8    |
| L-Serine                              | 10       | 6.1     |
| L-Tyrosine                            | 9.2      | 6.2     |
| Corn Starch                           | 315      | 315     |
| Maltodextrin 10                       | 35       | 35      |
| Sucrose                               | 350      | 350     |
| Cellulose, BW200                      | 50       | 50      |
| Soybean Oil                           | 25       | 25      |
| Lard                                  | 20       | 20      |
| Mineral Mix S10026                    | 10       | 10      |
| Di Calcium Phosphate                  | 13       | 13      |
| Calcium Carbonate                     | 5.5      | 5.5     |
| Potassium Citrate, 1 H <sub>2</sub> O | 16.5     | 16.5    |
| Vitamin Mix V10001                    | 10       | 10      |
| Choline Bitartrate                    | 2        | 2       |
| Dye                                   | 0.05     | 0.05    |
| Kcal/g                                | 3.85     | 3.85    |

**Supplemental Table 2: Sequence of the primers used for RT-PCR analysis.**

| Gene        | Primer sequence                | Source                        | Code          |
|-------------|--------------------------------|-------------------------------|---------------|
| <i>Esr1</i> | -                              | ThermoFisher                  | Mm00433147_m1 |
| <i>36b4</i> | For: 5'GGCGACCTGGAAGTCCAAC-3'  | Suppl. Reference <sup>2</sup> | -             |
| <i>36b4</i> | Rev: 5'CCATCAGCACCACAGCCTTC-3' | Suppl. Reference <sup>2</sup> | -             |

## Supplementary Methods

### Real-Time PCR Gene Expression Analysis

Total liver RNA extraction was isolated with TRIzol Reagent (Invitrogen, #15596026) and purified using the RNeasy minikit protocol (Qiagen, #74034), according to the manufacturer's instructions. For the preparation of cDNA, 1 µg RNA was denatured at 75°C for 5 min in the presence of 1.5 µg of random primers (Promega, #C1181) in 15 µL final volume. Deoxynucleotide triphosphate (GE Healthcare, #GEH28406552) and Moloney murine leukemia virus reverse transcriptase (M-MLV RT) (Promega, #M3682) were added at 0.5 mM and 8 U/ µL final concentration, respectively, in a final volume of 25 µL. The RT reaction was performed at 37°C for 1 h; the enzyme was inactivated at 75°C for 5 min. Control reactions without addition of the RT enzyme were performed for each sample. For the real-time PCR experiments, the reaction mix for each sample was made up of 2 µL of pre-diluted cDNA, 5 µL of TaqMan 2× Universal PCR Master Mix No AmpErase UNG (ThermoFisher/Life Technologies, #4324018), 0.5 µL of 20x primers/probes mix, and 2.5 µL of H<sub>2</sub>O. The primers used for the Real-Time PCR reactions were listed in Supplementary Table 2. The 36b4 primer was used as reference gene assay. The reaction was carried out according to the manufacturer's protocol using QuantStudio<sup>1.3</sup> Real-Time PCR System with the following thermal profile: 2 min at 50°C; 10 min 95°C; 40 cycles (15 sec 95°C, 1 min at 60°C), and data were analyzed using the 2<sup>-Ct</sup> method<sup>3</sup>.

### Biochemical Assays

The levels of glucose were measured with a glucometer according to the manufacturer's protocols. The levels of TG (BVN-K622-100, Biovision) and CH (BVN-K603-100, Biovision) in the plasma were measured with appropriate kits according to the manufacturer's protocols.

### Mouse Leptin ELISA assay

Plasma leptin content was measured with the EZML-82k kit (Millipore) according to the manufacturer's protocols.

### Cytokines levels

The levels of IL-6, IL-1 and TNF were measured with ELISA DuoSet kits (#DY406, #DY401 and #DY410, all from R&D System) according to the manufacturer's instructions. Plasma from mice treated i.p. with vehicle (0.9% NaCl) or 15mg/Kg of LPS for 6 hs were used as internal control of the assays.



## Western blot analysis

Samples of frozen mouse liver were homogenized in ice-cold buffer (20 mM HEPES, 5 mM MgCl<sub>2</sub>, 420 mM NaCl, 0.1 mM EDTA, and 20% glycerol) containing protease and phosphatase inhibitors (Phosphatase and Protease Inhibitor Mini Tablets, Pierce). After 3 repeated cycles of freezing and thawing, the homogenate was centrifuged at 16100g for 15 min at 4°C, and the supernatant was collected in a new tube. After appropriate quantitative analysis (Bradford assay, Pierce), equal amounts of the protein samples (50 µg of liver extracts) were resuspended in Laemmli sample buffer and separated in an 10% SDS polyacrylamide gel. 1ng and 5ng of ER recombinant protein (P2187, Panvera) and 50 µg of liver extract from ER KO mouse were used as positive and negative control, respectively. After transfer and blocking in 5% non-fat dried milk diluted in TBST (TBS, 0.1% Tween® 20), the nitrocellulose membranes were cut in correspondence of 50kD; the upper and lower part were incubated overnight at 4°C with the anti-ER and anti- $\beta$ -actin antibody, respectively. Then, membranes were incubated with the specific secondary antibody conjugated with peroxidase for 1h at r.t. The primary antibodies used were the following: anti-ER (from Thermo Scientific; MA5-14598, dilution 1:1000) and anti- $\beta$ -actin (from Sigma; A1978, dilution 1:4000). The secondary antibodies used were the following: goat anti-rat IgG (from Sigma-MERCK; AP136P, dilution 1:2000) and horse anti-mouse IgG (from VECTOR Laboratories; PI-2000, dilution 1:2000). Immunoreactivity was detected with an ECL Western Blotting Analysis System (Amersham) and acquired and analyzed using an Odyssey Fc Imaging system and the Image Studio<sup>®</sup> software (LiCorBiosciences). Uncropped and unprocessed scans of the blots are provided as a Source Data file.

## Supplementary References

1. Della Torre, Sara. RNA-Seq of mouse liver female transcriptome: role of estrogens and hepatic ER $\alpha$  in the metabolic adaptation to dietary BCAAs. (2021). <https://www.ncbi.nlm.nih.gov/bioproject/PRJNA778593>.
2. Villa, A. *et al.* Tetradian oscillation of estrogen receptor is necessary to prevent liver lipid deposition. *Proc. Natl. Acad. Sci.* **109**, 11806611811 (2012).
3. Schmittgen, T. D. & Livak, K. J. Analyzing real-time PCR data by the comparative CT method. *Nat. Protoc.* **3**, 110161108 (2008).
